# Supplementary material for: N-Acetylcysteine Enhances the Recovery of Ischemic Limb in Type-2 Diabetic Mice
Source: MDPI journal article supplement (doi:10.3390/antiox11061097), 2022-05-31
Supplement: s1 [file s1]

## Supplementary Figures and Figure Legends

**Figure S1**

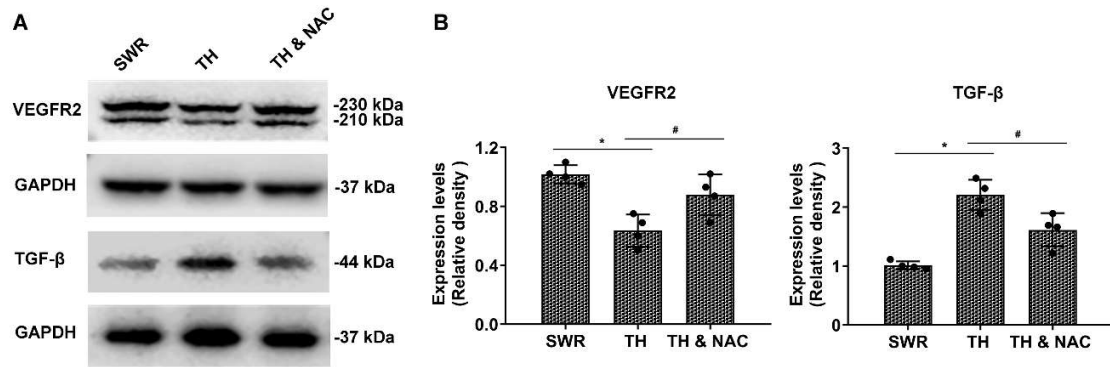

**Fig. S1. NAC treatment increased VEGFR2 expression, and decreased TGF- $\beta$  expression in diabetic ischemic limbs.** Gastrocnemius muscle tissue of ischemic limbs were harvested for detection of angiogenesis- and fibrosis-related proteins using Western blot assay. As shown in panels **A-B**, the expression of VEGFR2 in ischemic muscle tissue in diabetic mice was markedly decreased with increased levels of TGF- $\beta$  as compared to non-diabetic controls. NAC treatment partially, yet significantly, reversed the changes of VEGFR2 and TGF- $\beta$  levels in diabetic ischemic limbs ( $n=4$ , # $p<0.05$  for TH versus TH & NAC, C-D). VEGFR2, vascular endothelial growth factor receptor 2; TGF- $\beta$ , transforming growth factor beta; GAPDH, glyceraldehyde 3-phosphate dehydrogenase; other abbreviations as in Figure 2. All data were shown as means  $\pm$  SD. Significant difference was determined with one-way ANOVA with Bonferroni's post hoc test or Kruskal-Wallis test with Dunn post hoc test.
